# Supplementary material for: Advancement in the Breeding, Biotechnological and Genomic Tools towards Development of Durable Genetic Resistance against the Rice Blast Disease
Source: MDPI journal article supplement (doi:10.3390/plants11182386), 2022-09-13
Supplement: s1 [file s1]

**Table S1. List of blast disease resistant rice varieties developed through crossing with mutant varieties.**

| S. No. | Name of Mutant Variety | Registration Year in MVD | Country | Mutagen Used & Dose                                                                            | Character Improvement Details                                                                                                                                                               |
|--------|------------------------|--------------------------|---------|------------------------------------------------------------------------------------------------|---------------------------------------------------------------------------------------------------------------------------------------------------------------------------------------------|
| 1      | Gayatri (IET-8020)     | 1975                     | India   | hybridization with mutant variety Jagannath                                                    | Semi-dwarfness (100 cm), short grains, high yield, resistant to BLB, moderately resistant to blast and GM (gall Midge)                                                                      |
| 2      | Nadahikari             | 1977                     | Japan   | hybridization with one mutant Hyokeisake 18 obtained by irradiation with gamma rays.           | Short culm, high grain yield and resistance to leaf blast                                                                                                                                   |
| 3      | Shivam                 | 1978                     | India   | hybridization with mutant CR 314-5-10                                                          | semi-dwarfness, (95–110 cm), grains (short bold), highly resistance for blast, Gall Midge biotype 4, Sheath blight and leaf folder, yield (45-50 Q/ha) and maturity duration (115-125 days) |
| 4      | Katsurawase            | 1978                     | Japan   | hybridization with one mutant induced by irradiation with gamma rays.                          | Short and stiff culm, early maturity and resistance to blast                                                                                                                                |
| 5      | Sachiminori            | 1978                     | Japan   | hybridization with one mutant R4-B induced by irradiation with gamma rays.                     | Stiff culm and resistance to blast                                                                                                                                                          |
| 6      | Yawarakomachi          | 1980                     | Nigeria | hybridization with mutant line derived from variety Kinmaze treated with chemical mutagen NMU. | Low amylose content and good quality, It has a true resistant gene to the blast, Pia and the field resistance is slightly weak before heading and becomes moderate after heading            |
| 7      | Kefuhong 2             | 1981                     | China   | hybridization with mutant IR8                                                                  | Early maturity and resistance to blast                                                                                                                                                      |
| 8      | Xiushui 48             | 1981                     | China   | hybridization with mutant Funong 709                                                           | Resistance to blast, tolerance to low temperature, tolerance to day length and high yield                                                                                                   |
| 9      | Xianghu 24             | 1983                     | China   | hybridization with mutant Funong 709 [(Funong 709 x Jingyin 154) x Funong 709                  | Resistance to blast and blight, tolerance to day length and glutinous grain type                                                                                                            |
| 10     | PNR-519                | 1983                     | India   | gamma rays                                                                                     | Semi-dwarfness (100 cm), brown long slender grains, resistance to blast, Sheath blight, gall midge, leaf folder, yield (55 q/ha), maturity (85-115 days)                                    |
| 11     | Pusa-NR-381            | 1985                     | India   | hybridization with mutant Tainan-3 induced by                                                  | Resistance to blast                                                                                                                                                                         |

|    |                |      |       |                                                                                                                                 |                                                                                                                                                                                                                                       |
|----|----------------|------|-------|---------------------------------------------------------------------------------------------------------------------------------|---------------------------------------------------------------------------------------------------------------------------------------------------------------------------------------------------------------------------------------|
|    |                |      |       | irradiation with gamma rays                                                                                                     |                                                                                                                                                                                                                                       |
| 12 | Minnuo 706     | 1988 | China | gamma rays (250 Gy)                                                                                                             | Good tillering, higher yield, glutinous, resistance to blast, good quality                                                                                                                                                            |
| 13 | Daisenminori   | 1988 | Japan | hybridization with mutant Tori Kei 4 (dwarf mutant of Norin 8 induced by irradiation with gamma rays).                          | Resistance to lodging, high yield, good cooking quality and resistance to blast                                                                                                                                                       |
| 14 | Michinoku-wase | 1988 | Japan | hybridization with mutants descendant of mutant variety Reimei obtained by irradiation of seeds with gamma rays (200 Gy).       | Early maturity, resistance to leaf blast, high yield and good quality                                                                                                                                                                 |
| 15 | Keshari        | 1989 | India | X-rays                                                                                                                          | Short stem, moderately resistant to GLH (Green Leaf hopper), blast and BLB, high yield and early maturity                                                                                                                             |
| 16 | Hae-nuki       | 1993 | Japan | hybridization with mutant line derived from the mutant variety Reimei induced by irradiation of seeds with gamma rays (200 Gy). | Late maturity, high yield, good quality, resistance to lodging and resistance to blast disease                                                                                                                                        |
| 17 | Fukuhibiki     | 1995 | Japan | hybridization with mutant variety Dontokoi obtained by irradiation with gamma rays.                                             | High yielding ability, excellent plant type, high tolerance to lodging and suitable for sake brewing                                                                                                                                  |
| 18 | Fu 8970        | 1995 | China | hybridization with two mutants Fu 85151 and Fu 8638 obtained by physical irradiation                                            | High grain yield, improved seed production traits, big spike, higher grain number, higher grain weight, moderate maturity, compact plant type, resistance to blast and bacterial leaf disease, resistance to white-backed planthopper |
| 19 | II You 802     | 1996 | China | hybridization with one mutant Chuanhui 802 obtained by irradiation with gamma rays                                              | High grain yield, growth period (150 days), late maturity, compact plant type, strong tillering, more grains per panicle, grain weight (28 g), blast resistance                                                                       |
| 20 | Fuyou 130      | 1997 | China | hybridization with Fu 76A x 130                                                                                                 | Superior yield (12.5%), average height (116.1 cm), tolerance to low temperatures, strong tillering ability, blast resistance                                                                                                          |
| 21 | Hashiri-aji    | 1997 | Japan | by hybridization with mutant variety Niigatawase induced by irradiation of seeds with                                           | Early maturity, resistance to lodging, resistance to rice blast and good quality                                                                                                                                                      |

|    |               |      |                  |                                                                                                                                                             |                                                                                                                                                                                                                                                                                                                                                        |
|----|---------------|------|------------------|-------------------------------------------------------------------------------------------------------------------------------------------------------------|--------------------------------------------------------------------------------------------------------------------------------------------------------------------------------------------------------------------------------------------------------------------------------------------------------------------------------------------------------|
|    |               |      |                  | gamma rays (200 Gy)<br>hybridization with mutant<br>Mercury (cross<br>Mercury/Mercury//Koshihikari)<br>obtained by irradiation of seeds<br>with gamma rays. | Semi-dwarfness, early<br>maturity and resistance to<br>blast                                                                                                                                                                                                                                                                                           |
| 22 | Lafitte       | 1997 | United<br>States |                                                                                                                                                             |                                                                                                                                                                                                                                                                                                                                                        |
| 23 | Wandao 51     | 1997 | China            | hybridization with mutant                                                                                                                                   | High grain yield, good<br>quality, multiple resistance,<br>bacterial blight resistance,<br>resistance to blast and<br>insects<br>Superior yield (12.5%),<br>average yield of 7620 kg per<br>hectare, average height (115<br>cm), thick stem, compact<br>plant growth, light green<br>leaves, average of 150<br>grains per panicle, blast<br>resistance |
| 24 | Fuyou 838     | 1997 | China            | hybridization with two<br>mutants Fu74A and Fuhui 838                                                                                                       |                                                                                                                                                                                                                                                                                                                                                        |
| 25 | Soft 158      | 1997 | Japan            | hybridization with mutant<br>variety Kinuhikari induced by<br>gamma rays and mutant Ken-<br>kei 2078 obtained by treatment<br>with chemical mutagen EMS     | Low amylose content, true<br>resistance gene to rice blast,<br>Pi-a and moderate field<br>resistance to blast                                                                                                                                                                                                                                          |
| 26 | Asamurasaki   | 1998 | Japan            | hybridization with mutant<br>variety Fukuhibiki induced by<br>irradiation of seeds with<br>gamma rays (200 Gy)                                              | has true resistance gene of<br>Pi-a and high field<br>resistance to leaf blast, and<br>good cooking quality<br>High grain yield (10.9%), ,<br>altered maturity, growth<br>period (146 days), strong<br>tillering ability, average<br>height (109.4 cm), ear<br>length (24 cm), blast<br>resistance, medium-grain<br>quality                            |
| 27 | Fuyou 802     | 1998 | China            | hybridization with one mutant<br>Fu74A.                                                                                                                     | Day length sensitivity, late<br>maturity, wide adaptability,<br>semi-dwarf (110-120 cm),<br>short grains, good milling<br>recovery, tolerant to blast<br>and sheath blight and high<br>yield                                                                                                                                                           |
| 28 | Savitri       | 1999 | India            | Crossing with one mutant<br>(Jagannath)                                                                                                                     | High grain yield (10.1%),<br>improved plant structure,<br>growth period (126 days),<br>resistance to blast, bacterial<br>leaf blight and bacterial leaf<br>streak, resistance to white-<br>backed planthopper and<br>brown planthopper                                                                                                                 |
| 29 | Xieyou 371    | 1999 | China            | gamma rays (10 Gy)                                                                                                                                          | High yield, short culm,<br>resistance to lodging and                                                                                                                                                                                                                                                                                                   |
| 30 | Tsukushi-wase | 1999 | Japan            | hybridization with mutant<br>variety Kinuhikari obtained by                                                                                                 |                                                                                                                                                                                                                                                                                                                                                        |

|    |                               |      |       |                                                                                                                                                                     |                                                                                                                                                                                                                                              |
|----|-------------------------------|------|-------|---------------------------------------------------------------------------------------------------------------------------------------------------------------------|----------------------------------------------------------------------------------------------------------------------------------------------------------------------------------------------------------------------------------------------|
|    |                               |      |       | irradiation with gamma rays                                                                                                                                         | early maturity, It has the blast resistance gene Pi-i.                                                                                                                                                                                       |
| 31 | Haiminori                     | 2000 | Japan | hybridization with mutant line derived from Kinmaze treated with chemical mutagen NMU.                                                                              | medium to late maturity and resistance to blast disease                                                                                                                                                                                      |
| 32 | Okini-iri                     | 2000 | Japan | hybridization with mutant line derived from the mutant variety Reimei induced by irradiation of seeds with gamma rays (200 Gy).                                     | Superior eating quality and high field resistance to blast                                                                                                                                                                                   |
| 33 | Ideyu-mochi                   | 2000 | Japan | hybridization with mutant line derived from the mutant variety Reimei induced by gamma rays.                                                                        | Early-maturity, high-yielding variety with excellent processing quality of rice cakes, It has major resistant gene to rice blast, and has slightly-strong field resistance to leaf blast and has moderate field resistance to panicle blast. |
| 34 | Yawarakomachi                 | 2000 | Japan | hybridization with mutant line derived from variety Kinmaze treated with chemical mutagen NMU.                                                                      | Low amylose content and good quality, number of panicles is slightly greater. It has a true resistant gene to the blast                                                                                                                      |
| 35 | Aki-no-sei                    | 2000 | Japan | hybridization with mutant variety Miyama-nishiki induced by irradiation with gamma rays (300 Gy                                                                     | High percentage of white core rice and suitable for sake-brewing, resistance to leaf and panicle blast                                                                                                                                       |
| 36 | Asahi-no-yume                 | 2000 | Japan | hybridization with mutant variety Aichinokaori and mutant line derived from the mutant variety Reimei, both induced by irradiation of seeds with gamma rays (200 Gy | Early maturity, high yield, highly resistant to rice stripe disease and panicle blast                                                                                                                                                        |
| 37 | Oyama-nishiki                 | 2001 | Japan | hybridization with mutant line derived from the mutant variety Miyama-nishiki induced by gamma rays (300 Gy)                                                        | High percentage of white core rice, suitable for sake brewing and show blast resistance                                                                                                                                                      |
| 38 | Hanabusa                      | 2002 | Japan | hybridization with mutant line Douhoku No. 53, a sister line of mutant variety Aya obtained by irradiation with gamma rays                                          | Low amylose content (average 14%), boiled rice has high stickiness, good eating quality, medium maturity, more resistant to cool weather and blast disease                                                                                   |
| 39 | Koimusubi                     | 2002 | Japan | hybridization with mutant of mutant variety Mine-asahi obtained by irradiation of seeds with gamma rays (200 Gy)                                                    | Excellent cultivation characteristics, highly cold tolerance, blast resistance and excellent eating quality                                                                                                                                  |
| 40 | Koshihikari<br>Niigata BL No. | 2002 | Japan | by hybridization with mutant derived from mutant variety Reimei obtained by irradiation                                                                             | Resistance to blast                                                                                                                                                                                                                          |

|    |                    |      |       |                                                                                                                                 |                                                                                                                                                                                                                           |
|----|--------------------|------|-------|---------------------------------------------------------------------------------------------------------------------------------|---------------------------------------------------------------------------------------------------------------------------------------------------------------------------------------------------------------------------|
|    |                    |      |       | of seeds with gamma rays (200 Gy)                                                                                               |                                                                                                                                                                                                                           |
| 41 | Yume-akari         | 2002 | Japan | hybridization with mutant line derived from the mutant variety Reimei induced by irradiation of seeds with gamma rays (200 Gy)  | Medium maturity, high eating quality and tolerance to low temperatures and show resistance to blast                                                                                                                       |
| 42 | Chiho-no-kaori     | 2002 | Japan | hybridization with mutant variety Hagi-no-kaori induced by irradiation of seeds with gamma rays (200 Gy)                        | High yield, good quality, strong resistance to leaf blast and panicle blast                                                                                                                                               |
| 43 | Daichi-no-kaze     | 2002 | Japan | hybridization with mutant variety Matsuri-bare induced by irradiation of seeds with gamma rays (200 Gy)                         | Medium maturity, high yield, good eating quality, resistance to rice stripe disease and panicle blast, moderately resistant to bacterial leaf blight                                                                      |
| 44 | Benigoromo         | 2002 | Japan | hybridization with mutant variety Fukuhibiki obtained by irradiation of seeds with gamma rays (200 Gy).                         | Early maturity, short stem, high yield, large red grains, has a true resistance gene Pia to blast [Magnaporthe grisea], and the field resistance to leaf and panicle blasts are slightly weak and moderate, respectively. |
| 45 | Misato-nishiki     | 2002 | Japan | hybridization with mutant variety Miyama-nishiki obtained by irradiation with gamma rays (300 Gy)                               | Early maturity and high quality, blast disease resistance gene is estimated to be Pii type.                                                                                                                               |
| 46 | Yume-sayaka        | 2003 | Japan | hybridization with mutant line derived from the mutant variety Reimei induced by irradiation of seeds with gamma rays (200 Gy). | Very early maturity, nonglutinous rice variety, resistance to leaf blast and good quality                                                                                                                                 |
| 47 | Gin-otome          | 2003 | Japan | hybridization with mutant induced by gamma rays                                                                                 | Short culm, suitable for sake brewing                                                                                                                                                                                     |
| 48 | Oborozuki          | 2003 | Japan | It was developed by hybridization with mutant from in vitro culture                                                             | Low amylose content, good eating quality and high tolerance to low temperatures, field resistance to leaf blast is moderate to low                                                                                        |
| 49 | Oku-no-murasaki    | 2003 | Japan | hybridization with mutant line derived from the mutant variety Reimei induced by irradiation of seeds with gamma rays (200 Gy). | Nonglutinous purple grains, lodging resistance moderate eating quality. It has a true resistance gene Pib to blast.                                                                                                       |
| 50 | Aichi-no-kaori SBL | 2003 | Japan | hybridization with mutant variety Aichinokaori induced by irradiation of seeds with gamma rays (200 Gy).                        | High resistance to rice stripe disease and panicle blast and moderately resistance to bacterial leaf blight                                                                                                               |

|    |                                    |      |          |                                                                                                                                                                                                                                                  |                                                                                                                                                                                        |
|----|------------------------------------|------|----------|--------------------------------------------------------------------------------------------------------------------------------------------------------------------------------------------------------------------------------------------------|----------------------------------------------------------------------------------------------------------------------------------------------------------------------------------------|
| 51 | Mine-hibiki                        | 2003 | Japan    | hybridization with one mutant Mineasahi obtained by irradiation with gamma rays (200 Gy).                                                                                                                                                        | Extremely early maturity, lodging resistance, superior eating quality, high resistance to leaf and panicle blast                                                                       |
| 52 | Yume-no-kaori                      | 2003 | Japan    | cross between "Hattannishiki 1" and "YamagataSake 49 (cultivar Dewasansan obtained by irradiation with 300 Gy gamma rays                                                                                                                         | Good eating quality, suitable for sake brewing, good lodging resistance and resistance to blast                                                                                        |
| 53 | Yume-shizuku                       | 2003 | Japan    | by hybridization with mutant variety Kinuhikari induced by irradiation with gamma rays hybridization with mutant line derived from the mutant variety Reimei and mutant variety Yama-uta induced by irradiation of seeds with gamma rays (200 Gy | Early maturity, resistance to blast and good eating quality                                                                                                                            |
| 54 | Chiyo-no-mochi                     | 2003 | Japan    | hybridization with mutant varieties Reimei and Mine-asahi induced by irradiation of seeds with gamma rays (200 Gy)                                                                                                                               | Medium maturity, cool weather tolerance and high yielding ability                                                                                                                      |
| 55 | Fusa-no-mai                        | 2004 | Japan    | hybridization with mutant variety Mine-asahi induced by irradiation of seeds with gamma rays (200 Gy)                                                                                                                                            | high cold resistance, high resistance to the panicle blast                                                                                                                             |
| 56 | Fukumirai                          | 2004 | Japan    | hybridization with mutant variety Mine-asahi induced by irradiation of seeds with gamma rays (200 Gy)                                                                                                                                            | Non glutinous paddy rice, high yield and good quality                                                                                                                                  |
| 57 | OM2717                             | 2004 | Viet Nam | hybridization with mutantn variety TNDB 100 obtained by irradiation of seeds with gamma rays (50 Gy).                                                                                                                                            | Short duration (90-95 days), high yield (4-7 T/ha), good quality (long grain, amylose content: 20-24%),wide adaptation, intermediate resistant to brown plant hopper and blast disease |
| 58 | OM2718                             | 2004 | Viet Nam | gamma rays (50 Gy)                                                                                                                                                                                                                               | Short duration (90-95 days), high yield (5-8 t/ha), good quality, wide adaptation, intermediate resistant to brown plant hopper and blast disease                                      |
| 59 | Hyo-kei-sake No. 65 (Toji-no-hana) | 2004 | Japan    | hybridization with mutant variety Hyogo-Kitanishiki obtained by irradiation with gamma rays                                                                                                                                                      | Extremly early maturity, high resistance lodging, resistance to rice blast disease, high quality and high yield                                                                        |
| 60 | Mie-no-yume                        | 2004 | Japan    | hybridization with mutant variety Matsuri-bare obtained by irradiation of seeds with gamma rays (200 Gy)                                                                                                                                         | Medium maturity and high grain quality, blast resistance                                                                                                                               |
| 61 | Hyo-kei-sake No. 66 (Toji-no-yume) | 2004 | Japan    | hybridization with mutant variety Hyogo-Kitanishiki obtained by irradiation of seeds                                                                                                                                                             | extremly early maturity, high resistance for rice blast disease                                                                                                                        |

|    |                   |      |       |                                                                                                                                                                  |                                                                                                                                                                                                                        |
|----|-------------------|------|-------|------------------------------------------------------------------------------------------------------------------------------------------------------------------|------------------------------------------------------------------------------------------------------------------------------------------------------------------------------------------------------------------------|
|    |                   |      |       | with gamma rays                                                                                                                                                  |                                                                                                                                                                                                                        |
| 62 | Shun-you          | 2004 | Japan | hybridization with mutant variety Oochikara induced by irradiation with gamma rays and mutant variety LGC-1 obtained by treatment with chemical mutagen 0.2% EI. | Early-maturity, low proteins, tolerance to lodging, adaptability of direct sowing, moderate field resistance of blast                                                                                                  |
| 63 | Silky Pearl       | 2004 | Japan | hybridization with mutant variety Yama-uta induced by irradiation of seeds with 200 Gy gamma rays and mutant obtained by treatment with chemical mutagen NMU.    | Short culm, low amylose content, superior lodging resistance and good yielding ability, medium leaf and ear-blast resistances                                                                                          |
| 64 | Natsushizuka      | 2005 | Japan | hybridization with mutant variety Natsuhikari obtained by irradiation with gamma rays                                                                            | Extremely early maturity, lodging resistance, non glutinous paddy rice, highly resistant to leaf and panicle blast, and moderately resistant to bacterial leaf blight                                                  |
| 65 | Sai-no-kagayaki   | 2005 | Japan | hybridization with two mutant varieties Matsuri-bare and Sai-no-yume obtained by irradiation of seeds with gamma rays (200 Gy).                                  | Field resistance to blast, and resistance to stripe disease and green rice leaf hopper, tolerant to lodging with short culm and stiffness, good eating quality                                                         |
| 66 | Sai-no-kirabiyaka | 2005 | Japan | hybridization with two mutant varieties Matsuri-bare and Sai-no-yume obtained by irradiation of seeds with gamma rays (200 Gy)                                   | Field resistance to blast, and resistance to stripe disease and green rice leaf hopper, moderately resistance to bacterial leaf blight, tolerant to lodging with extreme short culm and stiffness, good eating quality |
| 67 | Tsukushi-roman    | 2005 | Japan | hybridization with mutant variety Yume-tsukushi obtained by irradiation with gamma rays and mutant Chubu No                                                      | Early maturity, high and stable palatability, has the blast resistance gene Pii and the field resistances to blast and bacterial leaf blight are weak                                                                  |
| 68 | Churahikari       | 2006 | Japan | hybridization with mutant obtained by mutant variety Mine-asahi irradiated with gamma rays (200 Gy)                                                              | High resistance to blast, medium-late maturity, shorter culm and lodging resistance                                                                                                                                    |
| 69 | Hana-omoi         | 2006 | Japan | hybridization with mutant variety Hanafubuki obtained by irradiation with gamma rays.                                                                            | Medium maturity, good quality, suitable for sake brewing                                                                                                                                                               |
| 70 | Sakihikari        | 2006 | Japan | hybridization with mutant variety Kinuhikari obtained by irradiation with gamma rays                                                                             | Excellent eating quality, late maturity and show blast resistance                                                                                                                                                      |

|    |                  |      |          |                                                                                                         |                                                                                                                                                                                                  |
|----|------------------|------|----------|---------------------------------------------------------------------------------------------------------|--------------------------------------------------------------------------------------------------------------------------------------------------------------------------------------------------|
| 71 | Zhongzao 25      | 2006 | China    | hybridization with two mutants.                                                                         | Early maturity, high yield, wide adaptability and blast resistance                                                                                                                               |
| 72 | Huaxiang 7       | 2007 | China    | treatment of seeds in aerospace                                                                         | High yield, good quality and resistance to blast<br>Late maturity, medium tillering ability, panicle is                                                                                          |
| 73 | Ilyou 623        | 2007 | China    | treatment of seeds in aerospace.                                                                        | large multi-grain, high yield, better grain quality and resistance to blast                                                                                                                      |
| 74 | Dewanosato       | 2007 | Japan    | hybridization with mutant variety Dewasansan obtained by irradiation of seeds with gamma rays (300 Gy). | Good quality, suitable for sake brewing and cool weather tolerance                                                                                                                               |
| 75 | Fuku-izumi       | 2007 | Japan    | hybridization with mutant variety Dontokoi obtained by irradiation with gamma rays.                     | Early maturity, short culm, excellent lodging resistance and stable yield<br>Medium maturity, good eating quality, high yield,                                                                   |
| 76 | Ikuhikari        | 2007 | Japan    | hybridization with mutant variety Dontokoi obtained by irradiation with gamma rays                      | show blast resistance, two resistant genes (Pita-2 and Pii), and the field resistance of the leaf and panicle can be rated as medium<br>Shorter culm, resistance to lodging, resistance to blast |
| 77 | Yuyakemochi      | 2009 | Japan    | hybridization with mutant variety Benigoromo obtained by irradiation of seeds with gamma rays (200 Gy)  | grains have higher dietary fiber, sodium, niacin, anthocyanidin, tannin, and catechin content                                                                                                    |
| 78 | Jianuo1 You No.3 | 2009 | China    | hybridization with mutant                                                                               | High yield, good panicle, resistance to blast, good quality<br>High yield, short culm, resistance to lodging and                                                                                 |
| 79 | Tsukushi-wase    | 2015 | Malaysia | hybridization with mutant variety Kinuhikari obtained by irradiation with gamma rays                    | early maturity, It has the blast resistance gene Pi-i. Field resistances to blast and bacterial leaf blight are week                                                                             |
